# Supplementary material
Source: HighWire-hosted journal article supplement (https://thorax.bmj.com/content/73/12/1174)
Supplement: inline-supplementary-material-1 [file inline-supplementary-material-1.pdf]

Association between asthma and lung function in adolescents born very preterm: results of the  
EPIPAGE cohort study

Online supplementary data

**Supplementary methods**

*The EPIPAGE study*

EPIPAGE (Etude EPIdémiologique sur les Petits Ages Gestationnels) was a prospective observational population-based cohort that included all births (live births and stillbirths) and late pregnancy terminations that occurred between 22 and 32 completed weeks of gestation in all maternity wards of nine French regions in 1997.[1] Two control groups were also included: one of individuals born at term (one in every four births at 39 or 40 weeks of gestation during 1 week in 1997), and one of moderate preterm infants, born between 33 and 34 weeks of gestation (inclusion during 2 months in 1997). At recruitment in the maternity or neonatal unit, parents were informed of the study and given written information. Oral consent was given to the medical team in charge of the study in accordance with French rules in force in 1997. The study was approved by the French Commission Nationale de l'Informatique et des Libertés (the French data protection agency). The objectives of the study were the following:[2]

- Description of obstetrical and neonatal practices for the care of very preterm new-borns
- Analysis of the causes of very preterm birth
- Measures of neonatal mortality and short- and long-term survival
- Evaluation of the children and their families during childhood
- Identification of the pre-, per-, and postnatal factors involved in the health of the child and his/her development
- Study of the adverse effects of intensive care techniques and treatments used for very preterm new-borns

Data for mothers, pregnancies, births, and neonatal outcomes were recorded on standardized questionnaires at each maternity and neonatal intensive care unit. Maternal data included ethnic origin, tobacco consumption during pregnancy, and causes of preterm birth. Neonatal data included gender, gestational age (determined from the last menstrual period and findings from early prenatal ultrasound scans, calculated in complete weeks), birth weight, postnatal sepsis (defined as a postnatally acquired infection treated with antibiotics for at least 7 days), necrotizing enterocolitis, and bronchopulmonary dysplasia (BDP). BPD was defined as the need for supplemental oxygen and/or ventilatory support at 36 weeks of post-menstrual age. Information about the health and the development of the children was subsequently collected by questionnaires sent to the families two months after discharge, and when the child was nine months, and one, two, three, and four years old. At two years of age, a questionnaire was also sent to the child's physician. At five years of age, the children were invited for a check-up with a physician and a psychologist at local centres in every region. At eight years of age, a questionnaire was sent to the families.

Of the 2901 preterm live born children that were included from January 1, 1997, to December 31, 1997 [1], 2459 (85%) were alive at discharge. At age five years, of the 2251 survivors (95%) whose parents agreed to follow-up at birth, 1812 (80%) had a clinical evaluation.[3] At age 8 years, 1444 questionnaires (64%) were completed by families. The full-term birth reference group consisted of 666 children. Follow-up rates were 59% (n = 396) at 5 years and 49% (n = 327) at 8 years.

EPIPAGEADO was restricted to the very preterm- and full-term born children in four French regions: Paris, Normandie, Pays-de-la-Loire, and Midi-Pyrénées.

### *Data collection from birth to 8 years of age*

The following data collected in EPIPAGE were analysed for EPIPAGEADO:

- Parental data: parents' occupational level and mother's tobacco consumption during pregnancy
- Perinatal and neonatal: gestational age at birth, birth weight, gender, and BPD, defined as the need for supplemental oxygen and/or ventilatory support at 36 weeks of post-menstrual age.
- Data concerning asthma and atopic symptoms collected at 2, 3, 4, 5, and 8 years of age by a parental and/or a physician questionnaire (asked questions detailed in Online Supplementary Table S1).

### *Assessment at 15 years of age*

#### *Data collection*

The investigator completed a questionnaire with the parents and the participant, with data on the family and school situation, parents' occupational level, tobacco habits of the parents and participants, current treatments and medical follow-up, and asthma, rhinitis, and eczema in the parents and siblings. Participant tobacco habits were assessed by the investigator during a confidential interview with each participant without his/her parents.

#### *ISAAC questionnaire*

Participants answered the French version of the standardized International Study of Asthma and Allergies in Childhood (ISAAC) questionnaire.[4] Participants were considered to have symptoms compatible with current asthma (labelled as teenage asthma) when they answered yes to the question "Have you had wheezing or whistling in the chest in the past 12 months?". They were considered to have allergic rhinitis when they answered yes to the question "Have you ever had a problem with sneezing, or a runny, or blocked nose when you DID NOT have a cold or the flu?" and/or to the question "Have you ever had hay fever?".

#### *Definition of the variable atopy*

Atopy was defined by the presence of eczema and/or rhinitis in the participant and/or by the presence of these symptoms and/or asthma in first degree relatives

#### *Lung function tests*

LFT were performed according to the recommendations of the American Thoracic Society/European Respiratory Society task force.[5] FEV<sub>1</sub> measures were expressed as Z-score values according to GLI 2012 lung function regression equations ([www.lungfunction.org](http://www.lungfunction.org)). Forced vital capacity (FVC), slow vital capacity (SVC), FEV<sub>1</sub>, functional residual capacity by plethysmography (FRC), total lung capacity (TLC), residual volume (RV), forced expiratory flow 50 (FEF50), and forced expiratory flow 25–75 (FEF25-75) were measured, before and 15 minutes after inhalation of 400µg salbutamol. A positive response to bronchodilators was defined by an increase in FEV<sub>1</sub> > 12% after inhalation of salbutamol. An obstructive ventilatory defect was defined by a FEV<sub>1</sub> Z-score < -1.64. FeNO and DLCO were also measured.

## References

- 1 Larroque B, Breart G, Kaminski M, *et al.* Survival of very preterm infants: Epipage, a population based cohort study. *Arch Child Fetal Neonatal Ed* 2004;**89**:F139-44.
- 2 Larroque B. [EPIPAGE: epidemiologic study of very premature infants. Protocol of the survey]. *Arch Pediatr Organe Off Soc Francaise Pediatr* 2000;**7 Suppl 2**:339s–342s.
- 3 Larroque B, Ancel PY, Marret S, *et al.* Neurodevelopmental disabilities and special care of 5-year-old children born before 33 weeks of gestation (the EPIPAGE study): a longitudinal cohort study. *Lancet* 2008;**371**:813–20.
- 4 Asher MI, Keil U, Anderson HR, *et al.* International Study of Asthma and Allergies in Childhood (ISAAC): rationale and methods. *Eur Respir J* 1995;**8**:483–91.
- 5 Miller MR, Hankinson J, Brusasco V, *et al.* Standardisation of spirometry. *Eur Respir J* 2005;**26**:319–38. doi:10.1183/09031936.05.00034805

**Online Supplementary Table S1: Collected asthma and atopic items**

| Age<br>at assessment (y) | Parental questionnaire                                                                                                                                 | Physician questionnaire                                                                        |
|--------------------------|--------------------------------------------------------------------------------------------------------------------------------------------------------|------------------------------------------------------------------------------------------------|
| 2                        | Since birth, did your child have asthma attacks?<br>Did your child have eczema in the last 12 months?                                                  | Asthmatic bronchitis between the ages of 1 and 2?<br>NA                                        |
| 3                        | Since the age of 2, has your child had asthma attacks (wheezing in the chest)? Asthmatic bronchitis?                                                   | NA                                                                                             |
| 4                        | Since the age of 3, has your child had asthma attacks (wheezing in the chest)? Asthmatic bronchitis?<br>Since the age of 3, has your child had eczema? | NA<br>NA                                                                                       |
| 5                        | NA<br>NA                                                                                                                                               | Asthma attacks or asthmatic bronchitis in the last 12 months?<br>Eczema in the last 12 months? |
| 8                        | Does your child have asthma?                                                                                                                           | NA                                                                                             |

NA: not assessed

**Online supplementary Table S2: Characteristics of the study population and comparison with non-participant subjects**

|                          |                 | Preterm children (24-32 wPMA) |                           |      | Full term (39-40 wPMA) |                           |      |
|--------------------------|-----------------|-------------------------------|---------------------------|------|------------------------|---------------------------|------|
|                          |                 | Included<br>(N = 304)         | Not included<br>(N = 501) |      | Included<br>(N = 47)   | Not included<br>(N = 133) |      |
|                          |                 | n (%)                         | n (%)                     | p    | n (%)                  | n (%)                     | p    |
| Gestational age at birth | 24-28 w PMA     | 97 (32)                       | 140 (28)                  | 0.23 |                        |                           |      |
|                          | 29-32 w PMA     | 207 (68)                      | 361 (72)                  |      |                        |                           |      |
| Sex                      | Male            | 154 (51)                      | 246 (49)                  | 0.67 | 18 (38)                | 79 (59)                   | 0.01 |
|                          | Female          | 150 (49)                      | 255 (51)                  |      | 29 (62)                | 54 (41)                   |      |
| BPD                      | No              | 249 (82)                      | 422 (86)                  | 0.13 |                        |                           |      |
|                          | Yes             | 55 (18)                       | 69 (14)                   |      |                        |                           |      |
|                          | NA              |                               | 10                        |      |                        |                           |      |
| Antenatal steroids       | No              | 59 (20)                       | 93 (19)                   | 0.82 | 41 (87)                | 108 (81)                  | 0.35 |
|                          | Yes             | 235 (80)                      | 386 (81)                  |      | 6 (13)                 | 25 (19)                   |      |
|                          | NA              | 10                            | 22                        |      |                        |                           |      |
| Received surfactant      | No              | 180 (60)                      | 306 (62)                  | 0.49 |                        |                           |      |
|                          | Yes             | 122 (40)                      | 187 (38)                  |      |                        |                           |      |
|                          | NA              | 2                             | 8                         |      |                        |                           |      |
| Postnatal steroids       | No              | 213 (71)                      | 373 (76)                  | 0.12 |                        |                           |      |
|                          | Yes             | 89 (29)                       | 121 (24)                  |      |                        |                           |      |
|                          | NA              | 2                             | 7                         |      |                        |                           |      |
| Birth weight             | < 1000gr        | 89 (29)                       | 117 (23)                  | 0.17 |                        |                           |      |
|                          | [1000gr-1500gr] | 115 (38)                      | 206 (41)                  |      |                        |                           |      |
|                          | ≥ 1500gr        | 100 (33)                      | 178 (36)                  |      |                        |                           |      |
| SGA                      | No              | 212 (73)                      | 362 (76)                  | 0.36 | 41 (95)                | 126 (95)                  | 0.98 |
|                          | Yes             | 78 (27)                       | 114 (24)                  |      | 2 (5)                  | 6 (5)                     |      |
|                          | NA              | 14                            | 25                        |      | 4                      | 1                         |      |
| ARDS                     | No              | 172 (57)                      | 290 (59)                  | 0.62 |                        |                           |      |
|                          | Yes             | 129 (43)                      | 202 (41)                  |      |                        |                           |      |
|                          | NA              | 3                             | 9                         |      |                        |                           |      |
| PDA requiring surgery    | No              | 291 (96)                      | 471 (95)                  | 0.49 |                        |                           |      |
|                          | Yes             | 11 (4)                        | 23 (5)                    |      |                        |                           |      |
|                          | NA              | 2                             | 7                         |      |                        |                           |      |
| Vascular collapse        | No              | 217 (73)                      | 361 (74)                  | 0.71 |                        |                           |      |
|                          | Yes             | 80 (27)                       | 125 (26)                  |      |                        |                           |      |
|                          | NA              | 7                             | 15                        |      |                        |                           |      |

|                             |               |          |          |        |         |          |      |
|-----------------------------|---------------|----------|----------|--------|---------|----------|------|
| Postnatal sepsis            | No            | 203 (67) | 340 (69) | 0.58   |         |          |      |
|                             | Yes           | 99 (33)  | 152 (31) |        |         |          |      |
|                             | NA            | 2        | 9        |        |         |          |      |
| Parents' occupational level | High income   | 70 (23)  | 94 (19)  | <0.001 | 20 (42) | 40 (30)  | 0.23 |
|                             | Medium income | 179 (59) | 242 (49) |        | 22 (47) | 69 (52)  |      |
|                             | Low income    | 53 (18)  | 162 (32) |        | 5 (11)  | 24 (18)  |      |
|                             | NA            | 2        | 3        |        |         |          |      |
| Smoking during pregnancy    | No            | 244 (81) | 353 (76) | 0.13   | 39 (83) | 100 (77) | 0.39 |
|                             | Yes           | 59 (19)  | 112 (24) |        | 8 (17)  | 30 (23)  |      |
|                             | NA            | 1        | 36       |        |         | 3        |      |
| Preschool wheeze            | No            | 166 (57) | 242 (56) | 0.64   | 33 (75) | 92 (78)  | 0.69 |
|                             | Yes           | 124 (43) | 194 (44) |        | 11 (25) | 26 (22)  |      |
|                             | NA            | 14       | 65       |        | 3       | 15       |      |
| School age asthma           | No            | 242 (83) | 360 (88) | 0.10   | 43 (91) | 100 (92) | 1.00 |
|                             | Yes           | 48 (17)  | 50 (12)  |        | 4 (9)   | 9 (8)    |      |
|                             | NA            | 14       | 91       |        |         | 24       |      |

Comparisons were performed using the Chi-square test (Fisher's exact test when required).

BPD: bronchopulmonary dysplasia; ARDS: Acute respiratory distress syndrome; PDA: Persistent ductus arteriosus; SGA: small for gestational age, defined as birth weight below -2SD.

**Online Supplementary Table S3: Asthma and wheezing outcomes**

|                                                                  | Preterm children<br>(N = 304) |           | Term children<br>(N = 47) |         | p    | Preterm<br>children with<br>BPD<br>(N = 55) |         | Preterm children<br>without BPD<br>(N = 249) |           | p    |
|------------------------------------------------------------------|-------------------------------|-----------|---------------------------|---------|------|---------------------------------------------|---------|----------------------------------------------|-----------|------|
|                                                                  | %                             | (n/N)     | %                         | (n/N)   |      | %                                           | (n/N)   | %                                            | (n/N)     |      |
| Preschool wheeze                                                 | 42.8                          | (124/290) | 25.0                      | (11/44) | 0.03 | 56.0                                        | (28/50) | 40.0                                         | (96/240)  | 0.04 |
| School age asthma                                                | 16.5                          | (48/290)  | 8.5                       | (4/47)  | 0.16 | 22.2                                        | (12/54) | 15.2                                         | (36/236)  | 0.21 |
| Wheezing or whistling<br>in the chest at any<br>time in the past | 54.0                          | (163/302) | 32.6                      | (15/46) | 0.01 | 54.5                                        | (30/55) | 53.8                                         | (133/247) | 0.92 |
| Teenage asthma<br>(wheezing in the chest<br>in the past 12 mo.)  | 13.9                          | (42/302)  | 17.4                      | (8/46)  | 0.53 | 18.2                                        | (10/55) | 13.0                                         | (32/247)  | 0.31 |
| Sleep disturbed by<br>wheezing in the past<br>12 mo.             | 4.6                           | (14/302)  | 4.3                       | (2/46)  | 1.00 | 3.6                                         | (2/55)  | 4.9                                          | (12/247)  | 1.00 |
| Speech limited by<br>wheezing in the past<br>12 mo.              | 2.0                           | (6/302)   | 2.2                       | (1/46)  | 1.00 | 1.8                                         | (1/55)  | 2.0                                          | (5/247)   | 1.00 |
| Ever having had<br>asthma                                        | 30.1                          | (91/302)  | 15.2                      | (7/46)  | 0.04 | 36.4                                        | (20/55) | 28.7                                         | (71/247)  | 0.27 |
| Exercise-induced<br>wheezing in the past<br>12 mo.               | 14.2                          | (43/302)  | 10.9                      | (5/46)  | 0.54 | 21.8                                        | (12/55) | 12.5                                         | (31/247)  | 0.08 |
| Nocturnal cough in the<br>past 12 mo.                            | 10.9                          | (33/302)  | 6.5                       | (3/46)  | 0.45 | 9.1                                         | (5/55)  | 11.3                                         | (28/247)  | 0.63 |

Comparisons were performed using the Chi-square test (Fisher's exact test when required).

mo: months. Preschool wheeze: wheezing symptoms between birth and 5 years old, assessed from the EIPAGE questionnaires. School age asthma: asthma at 8 years of age, assessed from the EIPAGE questionnaires.

**Online supplementary Table S4: Asthma groups and neonatal and postnatal environmental factors among preterm-born adolescents**

|                                                     | N   | Preschool wheeze |           | p    | School age asthma |          | p     | Teenage asthma |          | p    |
|-----------------------------------------------------|-----|------------------|-----------|------|-------------------|----------|-------|----------------|----------|------|
|                                                     |     | %                | (n/N)     |      | %                 | (n/N)    |       | %              | (n/N)    |      |
| Gestational age at birth                            |     |                  |           | 0.38 |                   |          | 0.25  |                |          | 0.82 |
| 24-28 w PMA                                         | 97  | 47               | (41/88)   |      | 13                | (12/93)  |       | 15             | (14/96)  |      |
| 29-32 w PMA                                         | 207 | 41               | (83/202)  |      | 18                | (36/197) |       | 14             | (28/206) |      |
| Sex                                                 |     |                  |           | 0.02 |                   |          | 0.79  |                |          | 0.93 |
| Male                                                | 154 | 49               | (74/150)  |      | 17                | (25/146) |       | 14             | (21/153) |      |
| Female                                              | 150 | 36               | (50/140)  |      | 16                | (23/144) |       | 14             | (21/149) |      |
| BPD                                                 |     |                  |           | 0.04 |                   |          | 0.21  |                |          | 0.31 |
| No                                                  | 249 | 40               | (96/240)  |      | 15                | (36/236) |       | 13             | (32/247) |      |
| Yes                                                 | 55  | 56               | (28/50)   |      | 22                | (12/54)  |       | 18             | (10/55)  |      |
| Birth weight                                        |     |                  |           | 0.88 |                   |          | 0.63  |                |          | 0.69 |
| < 1000gr                                            | 89  | 44               | (36/81)   |      | 19                | (16/86)  |       | 11             | (10/89)  |      |
| [1000gr-1500gr[                                     | 115 | 43               | (48/111)  |      | 14                | (15/108) |       | 15             | (17/113) |      |
| ≥ 1500gr                                            | 100 | 41               | (40/98)   |      | 18                | (17/96)  |       | 15             | (15/100) |      |
| Smoking during pregnancy                            |     |                  |           | 0.62 |                   |          | 0.10  |                |          | 0.92 |
| No                                                  | 244 | 43               | (100/231) |      | 18                | (43/234) |       | 14             | (34/242) |      |
| Yes                                                 | 59  | 40               | (23/58)   |      | 9                 | (5/55)   |       | 14             | (8/59)   |      |
| Environmental tobacco smoke exposure during infancy |     |                  |           | 0.88 |                   |          | 0.72  |                |          | 0.43 |
| No                                                  | 202 | 43               | (83/193)  |      | 16                | (32/197) |       | 13             | (26/201) |      |
| Yes                                                 | 98  | 42               | (40/95)   |      | 18                | (16/89)  |       | 16             | (16/98)  |      |
| Atopy                                               |     |                  |           | 0.15 |                   |          | 0.003 |                |          | 0.03 |
| No                                                  | 69  | 36               | (25/69)   |      | 6                 | (4/69)   |       | 7              | (5/69)   |      |
| Yes                                                 | 205 | 46               | (92/199)  |      | 22                | (42/193) |       | 18             | (37/205) |      |
| Parent's occupational level                         |     |                  |           | 0.21 |                   |          | 0.51  |                |          | 0.12 |
| High income                                         | 70  | 34               | (24/70)   |      | 12                | (8/64)   |       | 13             | (9/69)   |      |
| Medium income                                       | 179 | 47               | (80/172)  |      | 18                | (32/175) |       | 17             | (30/178) |      |
| Low income                                          | 53  | 40               | (19/47)   |      | 14                | (7/49)   |       | 6              | (3/53)   |      |

Comparisons were performed using the Chi-square test.

BPD: bronchopulmonary dysplasia



**Online supplementary Table S5: FEV<sub>1</sub> and neonatal and postnatal environmental factors among preterm-born adolescents**

|                                                     |                 | Pre-BD FEV <sub>1</sub> |            |                               |
|-----------------------------------------------------|-----------------|-------------------------|------------|-------------------------------|
|                                                     |                 | n                       | mean (SD)  | p <sub>1</sub> p <sub>2</sub> |
| Gestational age at birth                            |                 |                         |            | 0.003 1.00                    |
|                                                     | 24-28 w PMA     | 87                      | -0.9 (1.2) |                               |
|                                                     | 29-32 w PMA     | 187                     | -0.4 (1.3) |                               |
| BPD                                                 |                 |                         |            | <0.001 <0.001                 |
|                                                     | No              | 225                     | -0.4 (1.2) |                               |
|                                                     | Yes             | 49                      | -1.4 (1.2) |                               |
| Birth weight                                        |                 |                         |            | 0.002 0.37                    |
|                                                     | < 1000gr        | 78                      | -0.9 (1.1) |                               |
|                                                     | [1000gr-1500gr[ | 104                     | -0.6 (1.3) |                               |
|                                                     | ≥ 1500gr        | 92                      | -0.2 (1.3) |                               |
| Sex                                                 |                 |                         |            | 0.41                          |
|                                                     | Male            | 141                     | -0.5 (1.3) |                               |
|                                                     | Female          | 133                     | -0.6 (1.2) |                               |
| Smoking during pregnancy                            |                 |                         |            | 0.02 0.12                     |
|                                                     | No              | 223                     | -0.6 (1.2) |                               |
|                                                     | Yes             | 51                      | -0.2 (1.4) |                               |
| Environmental tobacco smoke exposure during infancy |                 |                         |            | 0.10                          |
|                                                     | No              | 183                     | -0.6 (1.2) |                               |
|                                                     | Yes             | 87                      | -0.4 (1.2) |                               |
| Atopy                                               |                 |                         |            | 0.25                          |
|                                                     | No              | 60                      | -0.4 (1.3) |                               |
|                                                     | Yes             | 187                     | -0.6 (1.2) |                               |
| Parent's occupational level                         |                 |                         |            | 0.91                          |
|                                                     | High income     | 65                      | -0.6 (1.2) |                               |
|                                                     | Medium income   | 157                     | -0.5 (1.3) |                               |
|                                                     | Low income      | 50                      | -0.5 (1.1) |                               |
| At least one cigarette in the last week             |                 |                         |            | 0.32                          |
|                                                     | No              | 260                     | -0.6 (1.2) |                               |
|                                                     | Yes             | 11                      | -0.2 (1.6) |                               |

Comparisons were performed by ANOVA.

p1: p value of univariate analysis

p2: p value of multivariate analysis including significantly associated variables in the univariate model

BPD: bronchopulmonary dysplasia

## **FIGURE LEGENDS**

Online supplementary Figure S1: Flowchart of the study population.

This figure represents the flowchart of the study population.

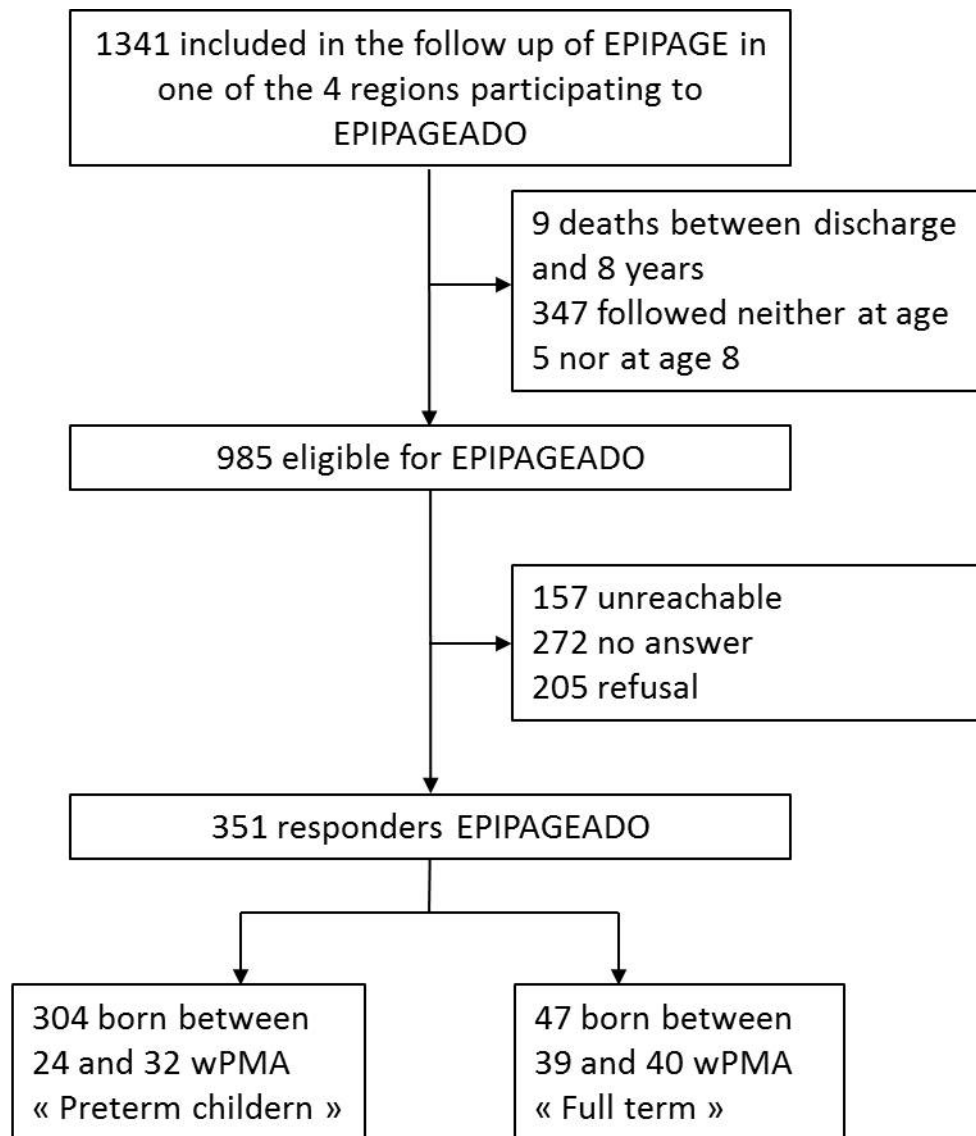

Online supplementary Figure S1: Flowchart of the study population
